# Supplementary material
Source: PubMed Central journal article supplement (PMC5460709)
Supplement: CJN.09270816SupplementaryData.pdf [file CJN.09270816SupplementaryData.pdf]

Supplemental material is neither peer-reviewed nor thoroughly edited by CJASN. The authors alone are responsible for the accuracy and presentation of the material.

**Supplemental Table 1. The overall sleep quality score scale according to each sleep parameter score**

| Sleep parameters   | Score      | Overall sleep quality score |
|--------------------|------------|-----------------------------|
| Insomnia           | AIS score  |                             |
|                    | <6         | 0                           |
|                    | ≥6         | 2                           |
| Daytime sleepiness | ESS score  |                             |
|                    | <10        | 0                           |
|                    | ≥10        | 2                           |
| Sleep duration     | 7-8hr/d    | 0                           |
|                    | 6-7hr/d    | 1                           |
|                    | ≥8hr/d     | 2                           |
|                    | <6hr/d     | 2                           |
| Snoring            | No         | 0                           |
|                    | occasional | 1                           |
|                    | Frequent   | 2                           |
| Total score        |            | 0 (best) -8 (worst)         |

Footnotes: AIS: Athens Insomnia Scale; ESS: the Epworth Sleepiness Scale.

Supplemental material is neither peer-reviewed nor thoroughly edited by CJASN. The authors alone are responsible for the accuracy and presentation of the material.

**Supplementary Table 2. The prevalence ratios (PRs) and 95% confidence intervals (95% CIs) of having chronic kidney disease (CKD), according to sleep status.**

|                             | High or very high risk of CKD |                 |                 | eGFR<60 ml/min/1.73m <sup>2</sup> or proteinuria>300mg/dl |                 |                 |
|-----------------------------|-------------------------------|-----------------|-----------------|-----------------------------------------------------------|-----------------|-----------------|
|                             | Age-sex adjusted              |                 | Full adjusted*  | Age-sex adjusted                                          |                 | Full adjusted*  |
|                             | Case/N                        | PR(95%CI)       | PR(95%CI)       | Case/N                                                    | PR(95%CI)       | PR(95%CI)       |
| Overall sleep quality score |                               |                 |                 |                                                           |                 |                 |
| <3                          | 146/8265                      | Ref 1           | Ref 1           | 425/8265                                                  | Ref 1           | Ref 1           |
| 3-5                         | 69/2630                       | 1.52(1.15-2.02) | 1.39(1.04-1.85) | 151/2630                                                  | 1.06(0.88-1.28) | 0.98(0.81-1.19) |
| >5                          | 9/145                         | 2.32(1.32-4.08) | 1.92(1.08-3.42) | 15/145                                                    | 1.13(0.77-1.64) | 0.97(0.66-1.43) |
| <i>P-trend</i>              |                               | 0.004           | 0.03            |                                                           | 0.54            | 0.88            |

\* Adjusted for age, sex, education level (primary, high school, or college), income level (<600RMB/month, 600-1000 RMB/month, or >1000 RMB/month), occupation(white collar, blue collar, or coalminer), physical activity( never, <4 times/week, or ≥4 times/week), smoking status(never, past smoker, or current smoker), alcohol consumption (never, past drinker, or current drinker), myocardial infarction history(no, yes ), stroke history(no, yes ), cancer history(no, yes ), hypertension(no, prehypertension, or hypertension), diabetes(no, prediabetes, or diabetes), use of sleep medication(no, yes ), body mass index(<24kg/m<sup>2</sup>, 24-28kg/m<sup>2</sup>, or ≥28kg/m<sup>2</sup>), triglyceride(<0.82mmol/L, 0.82-1.22mmol/L, 1.22-1.87mmol/L, or ≥1.87mmol/L), low density lipoprotein(<1.76mmol/L, 1.76-2.12mmol/L, 2.12-2.65mmol/L, or ≥2.65mmol/L), and high-density lipoprotein(<1.31mmol/L, 1.31-1.54mmol/L, 1.54-1.79mmol/L, or ≥1.79mmol/L).

Supplemental material is neither peer-reviewed nor thoroughly edited by CJASN. The authors alone are responsible for the accuracy and presentation of the material.

**Supplementary Table 3. Sensitivity analyses of the association between overall sleep quality score and eGFR<60 ml/min/1.73m<sup>2</sup> or proteinuria>300mg/dl, after excluding common chronic conditions.**

|                             | Model 1  |                 | Model 2  |                 | Model 3  |                 | Model 4  |                 | Model 5  |                 |
|-----------------------------|----------|-----------------|----------|-----------------|----------|-----------------|----------|-----------------|----------|-----------------|
|                             | Case/N   | OR(95%CI)       |
| Overall sleep quality score |          |                 |          |                 |          |                 |          |                 |          |                 |
| <3                          | 151/4560 | Ref 1           | 333/7384 | Ref 1           | 410/8014 | Ref 1           | 379/7406 | Ref 1           | 110/3755 | Ref 1           |
| 3-5                         | 39/1208  | 1.03(0.71-1.50) | 92/2264  | 0.80(0.62-1.02) | 141/2503 | 0.99(0.81-1.22) | 138/2346 | 1.03(0.84-1.27) | 24/966   | 0.84(0.53-1.34) |
| >5                          | 3/47     | 1.91(0.55-6.68) | 12/108   | 2.38(1.26-4.50) | 9/132    | 1.00(0.49-2.05) | 13/120   | 1.59(0.86-2.96) | 1/27     | 1.46(0.18-11.6) |
| P for trend                 |          | 0.58            |          | 0.67            |          | 0.94            |          | 0.37            |          | 0.56            |

Adjusted for age, sex, education level (primary, high school, or college), income level (<600RMB/month, 600-1000 RMB/month, or >1000 RMB/month), occupation(white collar, blue collar, or coalminer), physical activity( never, <4 times/week, or ≥4 times/week), smoking status(never, past smoker, or current smoker), alcohol consumption (never, past drinker, or current drinker), myocardial infarction history(no, yes ), stroke history(no, yes ), cancer history(no, yes ), hypertension(no, prehypertension, or hypertension), diabetes(no, prediabetes, or diabetes), use of sleep medication(no, yes ), body mass index(<24kg/m<sup>2</sup>, 24-28kg/m<sup>2</sup>, or ≥28kg/m<sup>2</sup>), triglyceride(<0.82mmol/L, 0.82-1.22mmol/L, 1.22-1.87mmol/L, or ≥1.87mmol/L), low density lipoprotein(<1.76mmol/L, 1.76-2.12mmol/L, 2.12-2.65mmol/L, or ≥2.65mmol/L), and high-density lipoprotein(<1.31mmol/L, 1.31-1.54mmol/L, 1.54-1.79mmol/L, or ≥1.79mmol/L).

Model 1 excluding participants with hypertension.

Model 2 excluding participants with diabetes.

Model 3 excluding participants with myocardial infarction, stroke or cancer.

Model 4 excluding participants who used sleep medications.

Model 5 excluding participants with hypertension, diabetes, myocardial infarction, stroke or cancer.

Supplemental material is neither peer-reviewed nor thoroughly edited by CJASN. The authors alone are responsible for the accuracy and presentation of the material.

**Supplementary Table 4. Sensitivity analyses of the association between overall sleep quality score and high or very high risk CKD, after excluding common chronic conditions.**

|                             | Model 1 |                 | Model 2  |                 | Model 3  |                 | Model 4  |                 | Model 5 |                 |
|-----------------------------|---------|-----------------|----------|-----------------|----------|-----------------|----------|-----------------|---------|-----------------|
|                             | Case/N  | OR(95%CI)       | Case/N   | OR(95%CI)       | Case/N   | OR(95%CI)       | Case/N   | OR(95%CI)       | Case/N  | OR(95%CI)       |
| Overall sleep quality score |         |                 |          |                 |          |                 |          |                 |         |                 |
| <3                          | 48/4560 | Ref 1           | 113/7384 | Ref 1           | 143/8014 | Ref 1           | 135/7406 | Ref 1           | 38/3755 | Ref 1           |
| 3-5                         | 16/1208 | 1.42(0.78-2.56) | 41/2264  | 1.09(0.76-1.60) | 67/2503  | 1.36(1.01-1.84) | 66/2346  | 1.42(1.04-1.92) | 7/966   | 0.75(0.32-1.72) |
| >5                          | 2/47    | 4.85(1.05-22.5) | 7/108    | 3.83(1.70-8.71) | 6/132    | 1.92(0.81-4.57) | 7/120    | 2.31(1.02-5.23) | 1/27    | 4.99(0.60-42.3) |
| P for trend                 |         | 0.07            |          | 0.06            |          | 0.02            |          | 0.006           |         | 0.89            |

Adjusted for age, sex, education level (primary, high school, or college), income level (<600RMB/month, 600-1000 RMB/month, or >1000 RMB/month), occupation(white collar, blue collar, or coalminer), physical activity( never, <4 times/week, or ≥4 times/week), smoking status(never, past smoker, or current smoker), alcohol consumption (never, past drinker, or current drinker), myocardial infarction history(no, yes ), stroke history(no, yes ), cancer history(no, yes ), hypertension(no, prehypertension, or hypertension), diabetes(no, prediabetes, or diabetes), use of sleep medication(no, yes ), body mass index(<24kg/m<sup>2</sup>, 24-28kg/m<sup>2</sup>, or ≥28kg/m<sup>2</sup>), triglyceride(<0.82mmol/L, 0.82-1.22mmol/L, 1.22-1.87mmol/L, or ≥1.87mmol/L), low density lipoprotein(<1.76mmol/L, 1.76-2.12mmol/L, 2.12-2.65mmol/L, or ≥2.65mmol/L), and high-density lipoprotein(<1.31mmol/L, 1.31-1.54mmol/L, 1.54-1.79mmol/L, or ≥1.79mmol/L).

Model 1 excluding participants with hypertension.

Model 2 excluding participants with diabetes.

Model 3 excluding participants with myocardial infarction, stroke or cancer.

Model 4 excluding participants who used sleep medications.

Model 5 excluding participants with hypertension, diabetes, myocardial infarction, stroke or cancer.

Supplemental material is neither peer-reviewed nor thoroughly edited by CJASN. The authors alone are responsible for the accuracy and presentation of the material.

**Supplementary Table 5. Sensitivity analyses of the association between overall sleep quality score and odds of having proteinuria, after excluding common chronic conditions**

|                             | Model 1 |                 | Model 2  |                 | Model 3  |                 | Model 4  |                 | Model 5 |                 |
|-----------------------------|---------|-----------------|----------|-----------------|----------|-----------------|----------|-----------------|---------|-----------------|
|                             | Case/N  | OR(95%CI)       | Case/N   | OR(95%CI)       | Case/N   | OR(95%CI)       | Case/N   | OR(95%CI)       | Case/N  | OR(95%CI)       |
| Overall sleep quality score |         |                 |          |                 |          |                 |          |                 |         |                 |
| <3                          | 61/4560 | Ref 1           | 175/7384 | Ref 1           | 230/8014 | Ref 1           | 210/7406 | Ref 1           | 43/3755 | Ref 1           |
| 3-5                         | 25/1208 | 1.51(0.93-2.45) | 60/2264  | 0.97(0.72-1.32) | 101/2503 | 1.19(0.93-1.52) | 100/2346 | 1.30(1.01-1.67) | 15/966  | 1.27(0.69-2.33) |
| >5                          | 24/47   | 3.02(0.68-13.3) | 9/108    | 2.72(1.31-5.63) | 7/132    | 1.34(0.63-2.85) | 10/120   | 1.91(0.95-3.83) | 1/27    | 3.30(0.42-25.6) |
| P for trend                 |         | 0.04            |          | 0.28            |          | 0.13            |          | 0.01            |         | 0.29            |

Adjusted for age, sex, education level (primary, high school, or college), income level (<600RMB/month, 600-1000 RMB/month, or >1000 RMB/month), occupation(white collar, blue collar, or coalminer), physical activity( never, <4 times/week, or ≥4 times/week), smoking status(never, past smoker, or current smoker), alcohol consumption (never, past drinker, or current drinker), myocardial infarction history(no, yes ), stroke history(no, yes ), cancer history(no, yes ), hypertension(no, prehypertension, or hypertension), diabetes(no, prediabetes, or diabetes), use of sleep medication(no, yes ), body mass index(<24kg/m<sup>2</sup>, 24-28kg/m<sup>2</sup>, or ≥28kg/m<sup>2</sup>), triglyceride(<0.82mmol/L, 0.82-1.22mmol/L, 1.22-1.87mmol/L, or ≥1.87mmol/L), low density lipoprotein(<1.76mmol/L, 1.76-2.12mmol/L, 2.12-2.65mmol/L, or ≥2.65mmol/L), and high-density lipoprotein(<1.31mmol/L, 1.31-1.54mmol/L, 1.54-1.79mmol/L, or ≥1.79mmol/L).

Model 1 excluding participants with hypertension.

Model 2 excluding participants with diabetes.

Model 3 excluding participants with myocardial infarction, stroke or cancer.

Model 4 excluding participants who used sleep medications.

*Supplemental material is neither peer-reviewed nor thoroughly edited by CJASN. The authors alone are responsible for the accuracy and presentation of the material.*

Model 5 excluding participants with hypertension, diabetes, myocardial infarction, stroke or cancer.
